# Supplementary material for: Development of nitrogen efficiency screening system in alfalfa (Medicago sativa L.) and analysis of alfalfa nitrogen efficiency types
Source: PeerJ. 2022 May 6;10:e13343. doi: 10.7717/peerj.13343 (PMC9083526; doi:10.7717/peerj.13343)
Supplement: Supplemental Information 1 [file peerj-10-13343-s001.xlsx]

## Sheet: Fig. 1 2
	Cultivars	N21	N210	N21	N210
1	Gannong NO. 3	0.214	0.711	0.214	0.711
2	Gannong NO. 4	0.384	0.769	0.384	0.769
3	Gannong NO. 5	0.866	0.840	0.866	0.84
4	Gannong NO. 7	0.593	0.267	0.593	0.267
5	Gannong NO. 8	0.135	0.068	0.135	0.068
6	Gannong NO. 9	0.711	0.286	0.711	0.286
7	Longdong	0.015	0.169	0.015	0.169
8	Xinjiangdaye	0.296	0.773	0.296	0.773
9	Xinmu NO. 1	0.438	0.714	0.438	0.714
10	Longmu 806	0.510	0.814	0.51	0.814
11	Longmu 801	0.754	0.346	0.754	0.346
12	Gongnong NO. 1	0.281	0.247	0.281	0.247
13	Gongnong NO. 3	0.604	0.166	0.604	0.166
14	Zhaodong	0.558	0.766	0.558	0.766
15	LW6010	0.910	0.967	0.91	0.967
16	Reindeer	0.426	0.276	0.426	0.276
17	Crown	0.535	0.798	0.535	0.798
18	Goldqueen	0.214	0.468	0.214	0.468
19	Giant 551	0.617	0.339	0.617	0.339
20	Giant 601	0.998	0.980	0.998	0.98
21	Giant 6	0.331	0.285	0.331	0.285
22	Giant 2	0.548	0.747	0.548	0.747
23	Sadie 7	0.179	0.183	0.179	0.183
24	Sadie 10	0.579	0.420	0.579	0.42
25	Tourists	0.033	0.255	0.033	0.255
26	Elite	0.770	0.326	0.77	0.326
27	Weston	0.399	0.216	0.399	0.216
28	Algonquin	0.400	0.329	0.4	0.329

## Sheet: Fig. 3
		N210					N21
shoot dry weight		Ⅰ	Ⅱ	Ⅲ	Ⅳ	Ⅴ	Ⅰ	Ⅱ	Ⅲ	Ⅳ	Ⅴ												0.00305505	0.0011547	0.0110604	0.0165025	0.0205508	0.004	0.00416333	0.00896289	0.0195021	0.0208087
	LW6010	0.124667	0.541217	0.801493	1.01837	1.21739	0.058	0.349463	0.50058	0.789784	0.88204												0.00472582	0.00680686	0.0209841	0.0158745	0.0289194	0.00264575	0.00305505	0.00264575	0.018	0.0115902
	Gannong NO.3	0.126667	0.481423	0.78034	0.978838	1.1937	0.029	0.330463	0.43182	0.615088	0.663373												0.00251661	0.00754983	0.0276104	0.0112694	0.00680686	0.00404145	0.0117189	0.019	0.00264575	0.0145029
	Gannong NO.7	0.0883333	0.384137	0.555567	0.76813	0.898227	0.0523333	0.339567	0.483747	0.768838	0.835173												0.00378594	0.0119304	0.0198578	0.0085049	0.0101489	0.00152753	0.00351188	0.00404145	0.0113725	0.00351188
	Longdong	0.0833333	0.371003	0.544507	0.754672	0.865913	0.0286667	0.323657	0.410167	0.589702	0.640553
		0.00305505	0.0011547	0.0110604	0.0165025	0.0205508	0.004	0.00416333	0.00896289	0.0195021	0.0208087
		0.00472582	0.00680686	0.0209841	0.0158745	0.0289194	0.00264575	0.00305505	0.00264575	0.018	0.0115902
		0.00251661	0.00754983	0.0276104	0.0112694	0.00680686	0.00404145	0.0117189	0.019	0.00264575	0.0145029
		0.00378594	0.0119304	0.0198578	0.0085049	0.0101489	0.00152753	0.00351188	0.00404145	0.0113725	0.00351188
		a	a	a	a	a	a	a	a	a	a
		a	a	a	b	a	b	bc	b	b	c
		b	b	b	c	b	a	ab	a	a	b
		b	b	b	c	b	b	c	c	b	c
		N210					N21
total root length		Ⅰ	Ⅱ	Ⅲ	Ⅳ	Ⅴ	Ⅰ	Ⅱ	Ⅲ	Ⅳ	Ⅴ
	LW6010	67.3439	162.966	340.833	445.608	467.93	86.963	188.61	338.178	372.534	440.833
	Gannong NO.7	66.7223	156.311	335.245	372.016	450.125	79.6893	165.787	287.169	326	401.689
	Gannong NO.7	59.9794	154.401	326.031	360.885	429.395	86.4245	167.823	320.417	343.739	401.772
	Longdong	58.7574	152.919	315.687	346.748	403.197	79.406	165.133	282.494	324.637	388.503
		0.179807	0.703005	0.607644	3.13332	1.8277	0.269985	0.609683	2.36439	0.377723	2.76913
		0.222868	0.472326	1.24817	2.38182	1.90705	0.479576	0.298368	1.34042	0.866411	1.29239
		0.144681	0.211376	0.930277	0.7369	1.84182	0.424569	0.384911	0.578322	1.53377	1.96752
		0.105464	0.296812	1.32825	2.22264	1.96683	0.0996975	0.681848	1.76876	1.73021	0.962738
		a	a	a	a	a	a	a	a	a	a
		a	ab	a	b	ab	b	b	b	b	b
		b	b	ab	b	bc	a	b	a	ab	b
		b	b	b	b	c	b	b	b	b	b
		N210					N21
whole plant nitrogen accumulation		Ⅰ	Ⅱ	Ⅲ	Ⅳ	Ⅴ	Ⅰ	Ⅱ	Ⅲ	Ⅳ	Ⅴ
	LW6010	4.00655	16.6863	30.4503	37.8654	41.7164	1.55441	12.1418	17.9422	28.8876	32.7246
	Gannong NO.3	4.1096	15.8799	28.6393	35.7345	41.3753	1.0889	11.6684	16.4379	23.8333	26.4935
	Gannong NO.7	3.17209	16.194	24.4678	31.0619	33.1801	1.56878	11.9614	17.496	27.4659	31.7281
	Longdong	2.94917	16.1176	25.8761	30.4669	33.1536	1.2559	12.1449	15.7799	22.6789	25.8557
		0.0378594	0.427122	1.14713	1.01056	1.82927	0.0757188	0.555698	0.472687	0.78143	2.04688
		0.182483	0.0754983	0.350856	1.10369	1.67572	0.04	0.145029	0.255408	0.450037	0.425245
		0.152753	0.0416333	1.0352	0.0351188	0.725052	0.0264575	0.305123	0.899685	0.618897	1.25129
		0.07	0.264071	0.533135	1.03929	0.617441	0.011547	0.142244	0.525071	0.651869	0.61825
		a	a	a	a	a	a	a	a	a	a
		a	b	b	b	a	c	a	bc	b	b
		b	b	c	c	b	a	a	ab	a	a
		b	b	c	c	b	b	a	c	b	b

## Sheet: Fig. 4
	NRT				SD
	Stem-leaf		Root		Stem-leaf		Root
	N210	N21	N210	N21	N210	N21	N210	N21
LW6010	211.085	208.611	280.798	229.433	7.17724	6.4067	1.71932	8.32728
Gannong NO.3	151.065	137.507	275.579	178.202	16.0609	0.633944	18.2856	3.92019
Gannong NO.7	144.687	149.116	155.959	146.469	1.33095	7.58667	5.38302	7.98569
Longdong	78.4525	88.1562	181.24	97.0074	7.42669	11.8402	16.6711	0.38821
	a	a	a	a
	b	b	a	b
	b	b	b	c
	c	c	b	d
	ATM				SD
	Stem-leaf		Root		Stem-leaf		Root
	N210	N21	N210	N21	N210	N21	N210	N21
LW6010	8.12497	5.35538	8.54999	7.23174	0.326483	0.139786	0.685312	0.618748
Gannong NO.3	3.04578	2.68335	5.09832	4.60455	0.0306212	0.059234	0.0204028	0.211244
Gannong NO.7	3.03265	3.53361	5.91189	4.87026	0.0606724	0.10021	0.083223	0.257921
Longdong	2.34895	2.19923	3.90941	3.53968	0.140008	0.0335493	0.054845	0.0498289
	a	a	a	a
	b	c	b	bc
	b	b	b	b
	c	d	c	c

## Sheet: Table S1
Table S1 Alfalfa cultivars and their source, distribution and origin
Number	Cultivars	Source	Distribution area	Origin
1	Gannong NO. 3	College of Prataculture Science, GAU	Northern area	China
2	Gannong NO. 4	Gansu Agricultural University College of Prataculture	Northern area	China
3	Gannong NO. 5	Gansu Academy of Agricultural Sciences	Northern area	China
4	Gannong NO. 7	Gansu Agricultural University College of Prataculture	Northern area	China
5	Gannong NO. 8	Gansu Agricultural University College of Prataculture	Northern area	China
6	Gannong NO. 9	Gansu Agricultural University College of Prataculture	Northern area	China
7	Longdong	Gansu Agricultural University College of Prataculture	Northern area	China
8	Xinjiangdaye	Gansu Agricultural University College of Prataculture	Northern area	China
9	Xinmu NO. 1	College of Prataculture and Environmental Science, Xinjiang Agricultural University	Northern area	China
10	Longmu 806	College of Prataculture and Environmental Science, Xinjiang Agricultural University	Northern area	China
11	Longmu 801	Heilongjiang Institute of Animal Husbandry	Northern area	China
12	Gongnong NO. 1	Animal Husbandry Branch, Jilin Academy of Agricultural Sciences	Northern area	China
13	Gongnong NO. 3	Animal Husbandry Branch, Jilin Academy of Agricultural Sciences	Northern area	China
14	Zhaodong	College of Prataculture and Environmental Science, Xinjiang Agricultural University	Northern area	China
15	LW6010	Purple pasture Co., Ltd.	Southern area	America
16	Reindeer	Beijing Kravo Grass Technology Development Center	Most parts of the north area	Canada
17	Crown	Beijing Kravo Grass Technology Development Center	Most parts of the north area	America
18	Goldqueen	College of Prataculture and Environmental Science, Xinjiang Agricultural University	Northern area	America
19	Giant 551	Beijing Kravo Grass Technology Development Center	Temperate area	America
20	Giant 601	Beijing Kravo Grass Technology Development Center	Temperate and warm temperate area	America
21	Giant 6	Beijing Kravo Grass Technology Development Center	Northern temperate area	America
22	Giant 2	Beijing Kravo Grass Technology Development Center	Northern cold area	America
23	Sadie 7	Purple pasture Co., Ltd	Southern area	Australia
24	Sadie 10	Purple pasture Co., Ltd	Southern area	Australia
25	Tourists	Purple pasture Co., Ltd	Southern area	Australia
26	Elite	Purple pasture Co., Ltd	Southern area	America
27	Weston	Purple pasture Co., Ltd	Subtropical area	America
28	Algonquin	College of Prataculture and Environmental Science, Xinjiang Agricultural University	Northern area	Canada

## Sheet: Table S2
Table S2 Changes of 28 alfalfa cultivars under low nitrogen level (N21) in seedling stage
NO.	Cultivars	SDW(g•plant -1)			RDW(g•plant -1)			PDW(g•plant -1)			SH(cm)			RL(cm•plant -1)			RV(cm3)			SNC(%)			RNC(%)			PNC(%)			SNA(mg•plant -1)			RNA(mg•plant -1)			PNA(mg•plant -1)
		1	2	3	1	2	3	1	2	3	1	2	3	1	2	3	1	2	3	1	2	3	1	2	3	1	2	3	1	2	3	1	2	3	1	2	3
1	Gannong NO. 3	0.3955	0.3789	0.3525	0.3627	0.3861	0.3504	0.7582	0.765	0.7029	7.96667	8.19667	7.83667	91.2145	108.215	70.9517	0.075	0.093	0.062	1.05714	1.04752	1.03433	1.25979	1.23123	1.25851	1.17322	1.14024	1.15606	0.413824	0.396455	0.368831	0.453318	0.482565	0.437945	0.876861	0.884726	0.812907
2	Gannong NO. 4	0.6834	0.8068	0.6404	0.3949	0.4183	0.3826	1.0783	1.2251	1.023	4.93333	5.16333	4.80333	62.1982	71.5889	81.5817	0.031	0.038	0.044	1.18709	1.18222	1.18165	1.26176	1.24928	1.24852	1.21444	1.15853	1.18162	0.808909	0.954972	0.758012	0.494883	0.524208	0.479469	1.27764	1.45158	1.21211
3	Gannong NO. 5	1.0425	1.1659	0.9995	0.4555	0.4789	0.4732	1.498	1.6448	1.4727	9.68333	9.91333	9.55333	79.5689	68.6904	77.1197	0.086	0.089	0.079	1.68401	1.70685	1.72743	1.41143	1.42652	1.41697	1.60113	1.62523	1.62768	1.77861	1.98914	1.70525	0.646039	0.679228	0.671143	2.42378	2.66131	2.38285
4	Gannong NO. 7	0.9113	1.0347	0.8683	0.4304	0.4438	0.4481	1.3417	1.4785	1.3164	8.86667	9.09667	8.73667	91.4247	69.4622	73.8764	0.07	0.057	0.051	1.46635	1.45781	1.44408	1.48387	1.47953	1.4847	1.47197	1.46432	1.4579	1.32692	1.5066	1.26431	0.638153	0.658021	0.664396	1.96523	2.16561	1.92817
5	Gannong NO. 8	0.589	0.5124	0.546	0.3058	0.3292	0.3235	0.8948	0.8416	0.8695	6.55	6.78	6.42	85.8971	83.7067	70.8171	0.058	0.044	0.036	1.36672	1.35708	1.3439	1.28334	1.28334	1.28634	1.33822	1.32823	1.3262	0.798626	0.694764	0.740322	0.39275	0.422803	0.415482	1.19088	1.12007	1.15721
6	Gannong NO. 9	0.9849	1.1083	0.9419	0.4006	0.424	0.4183	1.3855	1.5323	1.3602	7.53333	7.76333	7.40333	93.9608	93.8349	109.123	0.071	0.046	0.061	1.32645	1.35065	1.34555	1.73994	1.73994	1.73294	1.44601	1.45837	1.44314	1.32064	1.4861	1.26298	0.696084	0.736744	0.726839	2.00783	2.22056	1.97116
7	Longdong	0.6534	0.6768	0.6104	0.2666	0.29	0.2543	0.92	0.9668	0.8647	8.76667	8.99667	8.63667	30.162	29.13	31.05	0.018	0.019	0.023	1.22956	1.2253	1.22443	1.27642	1.27713	1.27478	1.24314	1.24085	1.23924	0.80135	0.830048	0.748613	0.340211	0.370072	0.324515	1.14179	1.19987	1.07316
8	Xinjiangdaye	0.8054	0.9288	0.9624	0.8299	0.8533	0.8176	1.6353	1.7821	1.78	6.71667	6.94667	6.58667	104.205	68.7151	66.8657	0.134	0.069	0.072	0.969053	1.10556	1.0693	0.915549	1.00598	0.973764	0.9419	1.05788	1.02542	0.844036	0.973356	1.00857	0.800934	0.823518	0.789064	1.64904	1.79707	1.79495
9	Xinmu NO. 1	0.8571	0.8805	0.8141	0.5187	0.5421	0.5064	1.3758	1.4226	1.3205	6.51667	6.74667	6.38667	56.1624	59.1827	69.569	0.045	0.05	0.047	1.21127	1.21853	1.2119	1.13709	1.14943	1.13626	1.1833	1.16171	1.17522	1.04043	1.06884	0.988234	0.591799	0.618497	0.577766	1.61438	1.6693	1.54949
10	Longmu 806	0.9284	1.0518	0.8854	0.4713	0.4747	0.459	1.3997	1.5265	1.3444	6.85	7.08	6.72	67.6271	39.7562	56.6307	0.08	0.037	0.058	1.31579	1.3481	1.31394	1.20104	1.20956	1.2183	1.31082	1.30502	1.29836	1.231	1.39463	1.17399	0.5701	0.574212	0.555221	1.82623	1.99167	1.75408
11	Longmu 801	1.0017	1.1251	0.9587	0.5019	0.5253	0.4896	1.5036	1.6504	1.4483	7.18333	7.41333	7.05333	63.1253	78.7446	50.3416	0.077	0.064	0.052	1.38708	1.38708	1.41908	1.36079	1.36079	1.36379	1.3783	1.37871	1.40377	1.40012	1.5726	1.34002	0.683484	0.71535	0.666734	2.08538	2.28898	2.00869
12	Gongnong NO. 1	0.7814	0.7048	0.7384	0.3296	0.323	0.3273	1.111	1.0278	1.0657	7.3	7.53	7.17	61.5753	77.9927	105.727	0.051	0.06	0.111	1.15709	1.18576	1.18343	1.09114	1.09114	1.11114	1.13752	1.15603	1.15908	0.918478	0.82844	0.867934	0.361837	0.354592	0.359312	1.27862	1.18287	1.22649
13	Gongnong NO. 3	0.2439	0.2473	0.2309	0.0695	0.0729	0.0672	0.3134	0.3202	0.2981	8.81667	9.04667	8.68667	78.0644	76.1703	45.6096	0.057	0.056	0.028	1.64024	1.65803	1.65613	1.26703	1.25911	1.25107	1.55747	1.56721	1.56482	0.402793	0.408408	0.381324	0.0875053	0.0917862	0.0846095	0.489897	0.500526	0.46598
14	Zhaodong	0.9302	1.0536	0.8872	0.57	0.5934	0.5977	1.5002	1.647	1.4849	7.88333	8.11333	7.75333	82.5303	81.4415	68.6259	0.054	0.06	0.038	1.12407	1.1493	1.13868	1.29056	1.28167	1.27911	1.18732	1.19699	1.18313	1.05796	1.19831	1.00906	0.731753	0.761794	0.767314	1.78396	1.95853	1.76577
15	LW6010	1.3655	1.2889	1.3225	0.9325	0.9559	0.9202	2.298	2.2448	2.2427	10.6667	10.8967	10.7367	71.8597	62.7581	76.4953	0.051	0.033	0.054	1.85007	1.89547	1.80477	1.33404	1.35086	1.33045	1.64067	1.66356	1.61015	2.52631	2.38459	2.44676	1.2481	1.27942	1.23164	3.76441	3.67726	3.67382
16	Reindeer	0.7961	0.9195	0.7531	0.4546	0.478	0.4423	1.2507	1.3975	1.1954	6.8	7.03	6.67	71.6621	64.516	49.4424	0.073	0.059	0.042	1.45076	1.45076	1.48276	1.30242	1.31581	1.31212	1.39684	1.41828	1.43072	1.16344	1.34378	1.1006	0.595579	0.626236	0.579464	1.77009	1.97786	1.69183
17	Crown	0.9738	1.0972	0.9308	0.6758	0.6992	0.6635	1.6496	1.7964	1.5943	6.6	6.83	6.47	86.6537	99.3228	99.0392	0.061	0.07	0.062	1.13553	1.13085	1.13019	1.32111	1.32385	1.32548	1.21156	1.20597	1.21147	1.10253	1.24224	1.05384	0.894408	0.925377	0.878129	1.99546	2.17304	1.92857
18	Goldqueen	0.5844	0.6078	0.5914	0.5752	0.5986	0.5629	1.1596	1.2064	1.1543	6.33333	6.56333	6.20333	78.6737	50.7478	55.6208	0.082	0.046	0.048	1.29735	1.27449	1.31792	0.946316	0.932742	0.932529	1.12322	1.0553	1.11535	0.757724	0.788064	0.7668	0.539075	0.561005	0.527547	1.27319	1.32458	1.26737
19	Giant 551	0.9204	1.0438	0.8774	0.3585	0.3619	0.3562	1.2789	1.4057	1.2336	7.83333	8.06333	7.70333	50.837	50.2683	63.025	0.036	0.05	0.043	1.64263	1.61975	1.66319	1.31927	1.31925	1.31226	1.55199	1.54238	1.56186	1.51116	1.71377	1.44056	0.472118	0.476595	0.469089	1.98495	2.18175	1.91464
20	Giant 601	1.2873	1.0107	1.2443	0.8225	0.8159	0.8802	2.1098	1.8266	2.1245	10.2667	10.4967	10.1367	61.4614	79.7991	94.6585	0.067	0.071	0.079	1.73496	1.83092	1.81494	1.42214	1.42214	1.43514	1.61301	1.64833	1.65758	2.30891	1.81279	2.23178	1.17328	1.16386	1.25558	3.45931	2.99496	3.48341
21	Giant 6	0.7093	0.7327	0.6663	0.6237	0.6471	0.6314	1.333	1.3798	1.2977	5.93333	6.16333	5.80333	60.4937	66.0771	59.5777	0.031	0.041	0.046	1.24923	1.24923	1.24123	1.08963	1.09072	1.01143	1.17455	1.17489	1.12942	0.884186	0.913356	0.830584	0.663572	0.688468	0.671765	1.54578	1.60005	1.50484
22	Giant 2	0.8622	0.9856	0.8192	0.7053	0.7287	0.693	1.5675	1.7143	1.5122	6.58333	6.81333	6.45333	69.9162	69.3722	70.6211	0.055	0.063	0.088	1.32837	1.34265	1.31751	1.08573	1.08573	1.09873	1.21919	1.23344	1.21725	1.1463	1.31037	1.08914	0.76882	0.794327	0.755412	1.91751	2.09709	1.84986
23	Sadie 7	0.4472	0.4506	0.4042	0.2526	0.266	0.2403	0.6998	0.7166	0.6445	6.825	7.055	6.695	60.8864	90.602	75.565	0.069	0.075	0.057	1.14879	1.14079	1.14032	1.30145	1.31482	1.31114	1.20389	1.20539	1.21519	0.511283	0.51517	0.462121	0.330688	0.34823	0.314585	0.845469	0.865766	0.778658
24	Sadie 10	0.9646	1.088	0.9216	0.4404	0.4638	0.4581	1.405	1.5518	1.3797	8.48333	8.71333	8.35333	53.6773	69.1357	64.7908	0.032	0.05	0.039	1.38149	1.39491	1.3702	1.21416	1.1915	1.21583	1.32904	1.33411	1.31894	1.33327	1.50384	1.27384	0.531633	0.559881	0.553	1.86495	2.05981	1.83137
25	Tourists	0.5105	0.6339	0.4675	0.2793	0.2827	0.277	0.7898	0.9166	0.7445	7.3	7.53	7.17	64.6442	47.5427	38.2317	0.08	0.074	0.062	1.35228	1.37102	1.36865	1.5195	1.50386	1.51468	1.41141	1.41199	1.42298	0.696312	0.864627	0.637661	0.422491	0.427634	0.419012	1.11793	1.29741	1.05381
26	Elite	0.7023	0.7257	0.6593	0.2748	0.2782	0.2725	0.9771	1.0039	0.9318	6.85	7.08	6.72	77.8525	75.6701	73.2217	0.075	0.085	0.062	1.33367	1.36212	1.3599	1.24643	1.25852	1.23547	1.30913	1.3445	1.32351	0.949436	0.98107	0.891304	0.342622	0.346862	0.339755	1.29535	1.33088	1.2353
27	Weston	0.8926	1.016	0.8496	0.452	0.4754	0.4397	1.3446	1.4914	1.2893	6.1	6.23	5.87	65.4399	90.9915	58.2579	0.083	0.091	0.058	1.25106	1.28756	1.25131	0.973193	0.972118	0.970656	1.15765	1.15832	1.14537	1.12763	1.28352	1.07331	0.439339	0.462084	0.427384	1.55137	1.72075	1.48757
28	Algonquin	0.7203	0.8437	0.6773	0.3737	0.3971	0.3914	1.094	1.2408	1.0687	7.6	7.83	7.47	67.2958	69.5411	96.8544	0.052	0.035	0.07	1.53192	1.54538	1.54065	1.35731	1.34402	1.34366	1.47227	1.54893	1.5192	1.10877	1.29872	1.04258	0.503871	0.535422	0.527736	1.65573	1.87791	1.61744
Note: SDW, RDW, PDW, SH, RL, RV, SNC, RNC, PNC, SNA, RNA and PNA respective shoot dry weight, root dry weight, plant dry weight, plant height, total root length, total root volume, shoot nitrogen content, root nitrogen content, plant nitrogen content, shoot nitrogen accumulation, root nitrogen accumulation and plant nitrogen accumulation.
Table S2 Changes of 28 alfalfa cultivars under low nitrogen level (N21) in seedling stage
NO.	Cultivars	SDW	RDW	PDW	SH	RL	RV	SNC	RNC	PNC	SNA	RNA	PNA
		(g•plant -1)	(g•plant -1)	(g•plant -1)	(cm)	(cm•plant -1)	(cm3)	(%)	(%)	(%)	(mg•plant -1)	(mg•plant -1)	(mg•plant -1)
1	Gannong NO. 3	0.38±0.02l	0.37±0.02kl	0.74±0.03mn	8.00±0.20f	90.13±18.66abc	0.08±0.02abcd	1.05±0.01q	1.25±0.02j	1.16±0.02kl	0.39±0.02m	0.46±0.02o	0.86±0.04m
2	Gannong NO. 4	0.71±0.09ghi	0.40±0.02ij	1.11±0.10ij	4.97±0.21o	71.79±9.69bcdef	0.04±0.01hi	1.18±0.00n	1.25±0.01ij	1.18±0.03jkl	0.84±0.10jkl	0.50±0.02mn	1.31±0.12l
3	Gannong NO. 5	1.07±0.09bc	0.47±0.01h	1.54±0.09de	9.72±0.15c	75.13±5.71abcde	0.08±0.01ab	1.71±0.02c	1.42±0.01d	1.62±0.01a	1.82±0.15c	0.67±0.02gh	2.49±0.15c
4	Gannong NO. 7	0.94±0.09cde	0.44±0.01h	1.38±0.09fg	8.90±0.20d	78.25±11.62abcde	0.06±0.01bcdefgh	1.46±0.01f	1.48±0.00c	1.46±0.01d	1.37±0.13ef	0.65±0.01h	2.02±0.13defg
5	Gannong NO. 8	0.55±0.04jk	0.32±0.01m	0.87±0.03klm	6.58±0.20klm	80.14±8.15abcd	0.05±0.01efghi	1.36±0.01hi	1.28±0.00h	1.33±0.01g	0.74±0.05kl	0.41±0.02p	1.16±0.04l
6	Gannong NO. 9	1.01±0.09cde	0.41±0.01i	1.43±0.09efg	7.57±0.21hi	98.97±8.79a	0.06±0.01bcdefgh	1.34±0.01hi	1.74±0.00a	1.45±0.01de	1.36±0.12ef	0.72±0.02f	2.07±0.13de
7	Longdong	0.65±0.03hij	0.27±0.02n	0.92±0.05kl	8.80±0.20de	30.11±0.96g	0.02±0.00i	1.23±0.00lm	1.28±0.00hi	1.24±0.00h	0.79±0.04kl	0.34±0.02q	1.14±0.06l
8	Xinjiangdaye	0.90±0.08de	0.83±0.02b	1.73±0.08c	6.75±0.15kl	79.93±21.04abcd	0.09±0.04a	1.05±0.07q	0.97±0.05o	1.01±0.06n	0.94±0.09ijk	0.80±0.02d	1.75±0.08hijk
9	Xinmu NO. 1	0.85±0.03ef	0.52±0.02g	1.37±0.05fg	6.55±0.15lm	61.64±7.03def	0.05±0.00defghi	1.21±0.00mn	1.14±0.01l	1.17±0.001jkl	1.03±0.04hij	0.60±0.02ij	1.61±0.06jk
10	Longmu 806	0.96±0.09cde	0.47±0.01h	1.42±0.09efg	6.88±0.20k	54.67±14.04ef	0.06±0.02bcdefgh	1.33±0.02ij	1.21±0.01k	1.30±0.01g	1.27±0.11efg	0.57±0.01jk	1.86±0.12efghi
11	Longmu 801	1.03±0.09cd	0.51±0.02g	1.53±0.1de	7.22±0.15j	64.07±14.23def	0.06±0.01abcdefgh	1.4±0.02g	1.36±0.00e	1.39±0.01f	1.44±0.12de	0.69±0.02fg	2.13±0.14d
12	Gongnong NO. 1	0.74±0.04fgh	0.33±0.00m	1.07±0.04ij	7.33±0.15ij	81.77±22.32abcd	0.07±0.03abcde	1.18±0.02no	1.10±0.01m	1.15±0.01l	0.87±0.05jkl	0.36±0.00q	1.23±0.05l
13	Gongnong NO. 3	0.24±0.01m	0.07±0.00o	0.31±0.01o	8.85±0.15de	66.61±18.22cdef	0.05±0.02defghi	1.65±0.01d	1.26±0.01hij	1.56±0.01b	0.40±0.01m	0.09±0.00r	0.49±0.02n
14	Zhaodong	0.96±0.09cde	0.59±0.01f	1.54±0.09de	7.92±0.15fg	77.53±7.73abcde	0.05±0.01cdefgh	1.14±0.01op	1.28±0.01h	1.19±0.01ijk	1.09±0.10ghi	0.75±0.02e	1.84±0.11fghi
15	LW6010	1.33±0.04a	0.94±0.02a	2.26±0.03a	10.77±0.12a	70.37±6.99bcdef	0.05±0.01efghi	1.85±0.05a	1.34±0.01ef	1.64±0.03a	2.45±0.07a	1.25±0.02a	3.71±0.05a
16	Reindeer	0.82±0.09efg	0.46±0.02h	1.28±0.10gh	6.83±0.15kl	61.87±11.34def	0.06±0.02bcdefgh	1.46±0.02f	1.31±0.01g	1.42±0.02ef	1.20±0.13fgh	0.60±0.02ij	1.81±0.15ghij
17	Crown	1.00±0.09cd	0.68±0.02d	1.68±0.10cd	6.63±0.15klm	95.01±7.23ab	0.06±0.00abcdefgh	1.13±0.00p	1.32±0.00fg	1.21±0.00hij	1.13±0.10gh	0.90±0.02c	2.03±0.13def
18	Goldqueen	0.59±0.01ij	0.58±0.02f	1.17±0.03hi	6.37±0.21m	61.68±14.92def	0.06±0.02bcdefgh	1.3±0.02jk	0.94±0.01p	1.10±0.04m	0.77±0.02kl	0.54±0.02kl	1.29±0.03l
19	Giant 551	0.95±0.09cde	0.36±0.09l	1.31±0.09fgh	7.87±0.21fgh	54.71±7.21ef	0.04±0.01fghi	1.64±0.02d	1.32±0.00fg	1.55±0.01b	1.56±0.14d	0.47±0.00no	2.03±0.14def
20	Giant 601	1.18±0.15b	0.84±0.04b	2.02±0.17b	10.30±0.20b	78.64±16.63abcde	0.07±0.01abcdef	1.79±0.05b	1.43±0.01d	1.64±0.02a	2.12±0.27b	1.20±0.05b	3.31±0.28b
21	Giant 6	0.70±0.03ghi	0.63±0.01e	1.34±0.04fg	5.97±0.21n	62.05±3.52def	0.04±0.01ghi	1.25±0.00lm	1.06±0.05n	1.16±0.03kl	0.88±0.04jkl	0.67±0.01gh	1.55±0.05k
22	Giant 2	0.89±0.09de	0.71±0.02c	1.6±0.10cd	6.62±0.15klm	69.97±0.63cdef	0.07±0.02abcdefg	1.33±0.01ij	1.09±0.01m	1.22±0.01hi	1.18±0.11fgh	0.77±0.02de	1.95±0.13defgh
23	Sadie 7	0.43±0.03kl	0.25±0.01n	0.69±0.04n	6.86±0.21k	75.68±14.86abcde	0.07±0.01abcdefgh	1.14±0.00op	1.31±0.01g	1.21±0.01hij	0.50±0.03m	0.33±0.02q	0.83±0.05m
24	Sadie 10	0.99±0.09cd	0.45±0.01h	1.45±0.09ef	8.52±0.15c	62.53±7.97def	0.04±0.01ghi	1.38±0.01gh	1.21±0.01k	1.33±0.01g	1.37±0.12ef	0.55±0.01kl	1.92±0.12defgh
25	Tourists	0.54±0.09jk	0.28±0.00n	0.82±0.09lmn	7.33±0.15ij	50.14±13.40fg	0.07±0.01abcdef	1.36±0.01ghi	1.51±0.01b	1.42±0.01ef	0.73±0.12l	0.42±0.00p	1.16±0.13l
26	Elite	0.7±0.03ghi	0.28±0.00n	0.97±0.04jk	6.88±0.20k	75.58±2.32abcde	0.07±0.01abcde	1.35±0.02hi	1.25±0.01j	1.33±0.02g	0.94±0.05ijk	0.34±0.00q	1.29±0.05l
27	Weston	0.92±0.09de	0.46±0.02h	1.38±0.10fg	6.07±0.15n	71.56±17.20bcdef	0.08±0.02abc	1.26±0.02kl	0.97±0.00o	1.15±0.01kl	1.16±0.11gh	0.44±0.02op	1.59±0.12k
28	Algonquin	0.75±0.09fgh	0.39±0.01jk	1.13±0.09i	7.63±0.15ghi	77.90±16.46abcde	0.05±0.02cdefgh	1.54±0.01e	1.35±0.01e	1.51±0.04c	1.15±0.13gh	0.52±0.02lm	1.72±0.14ijk

## Sheet: Table S3
Table S3 Changes of 28 alfalfa cultivars under medium nitrogen level (N210) in seedling stage
NO.	Cultivars	SDW(g•plant -1)			RDW(g•plant -1)			PDW(g•plant -1)			SH(cm)			RL(cm•plant -1)			RV(cm3)			SNC(%)			RNC(%)			PNC(%)			SNA(mg•plant -1)			RNA(mg•plant -1)			PNA(mg•plant -1)
		1	2	3	1	2	3	1	2	3	1	2	3	1	2	3	1	2	3	1	2	3	1	2	3	1	2	3	1	2	3	1	2	3	1	2	3
1	Gannong NO. 3	2.4678	2.1912	2.0248	0.2264	0.2498	0.2441	2.6942	2.441	2.2689	15.1	15.4	15	55.8589	34.1847	30.0119	0.055	0.031	0.025	2.13123	2.16815	2.13169	2.83351	2.79392	2.72671	2.19025	2.23218	2.19571	5.2902	4.69725	4.34054	0.630459	0.695622	0.679749	5.94353	5.38496	5.0053
2	Gannong NO. 4	2.1655	2.2889	2.1225	0.1194	0.1428	0.1471	2.2849	2.4317	2.2696	15.8667	16.0667	15.7667	40.9231	48.0071	49.1405	0.03	0.018	0.021	3.0978	2.79992	2.98086	3.48736	3.48736	3.50036	3.11816	2.84029	3.01453	6.40886	6.77407	6.2816	0.416909	0.498614	0.513629	6.83412	7.2732	6.78836
3	Gannong NO. 5	2.2534	2.1768	2.3104	0.1991	0.1925	0.1968	2.4525	2.3693	2.5072	17.65	17.85	17.55	47.3332	39.8223	31.9999	0.027	0.017	0.021	3.38113	3.31236	3.37875	3.02618	3.17066	3.11142	3.35232	3.30085	3.35777	7.5656	7.30842	7.75697	0.617757	0.597279	0.610621	8.18394	7.9063	8.36647
4	Gannong NO. 7	1.3484	1.3718	1.3054	0.1866	0.19	0.1843	1.535	1.5618	1.4897	14.7833	14.9833	14.6833	59.4622	70.5518	49.6598	0.075	0.134	0.069	3.28817	3.21763	3.2349	3.23878	3.25968	3.21223	3.28217	3.22275	3.2321	4.37812	4.4541	4.23851	0.604005	0.615011	0.59656	4.98211	5.06909	4.83508
5	Gannong NO. 8	1.2211	1.0445	1.1781	0.2002	0.2036	0.1879	1.4213	1.2481	1.366	14.7667	14.9667	14.6667	26.215	46.3655	38.8466	0.03	0.052	0.016	2.19001	2.34892	2.30146	3.43897	3.43404	3.46951	2.36594	2.52593	2.46213	2.78427	2.3816	2.68622	0.690191	0.701912	0.647786	3.48408	3.05951	3.34852
6	Gannong NO. 9	1.4392	1.4626	1.3962	0.191	0.1844	0.1893	1.6302	1.647	1.5855	13.6833	13.8833	13.5833	51.2719	35.248	51.3977	0.033	0.03	0.024	3.19082	3.16811	3.21147	3.30311	3.28173	3.30542	3.20398	3.18083	3.22268	4.59124	4.66589	4.45406	0.62968	0.607922	0.624076	5.22071	5.27451	5.07756
7	Longdong	1.7628	1.6862	1.7198	0.1512	0.1746	0.1389	1.914	1.8608	1.8587	13.35	13.55	13.25	50.9637	48.5375	50.8386	0.049	0.024	0.082	2.11245	2.14468	2.11057	2.6383	2.6608	2.61255	2.15399	2.19311	2.14808	3.74166	3.57907	3.65039	0.398747	0.460458	0.366309	4.14393	4.02875	4.0242
8	Xinjiangdaye	2.3913	2.4147	2.4483	0.1643	0.1877	0.152	2.5556	2.6024	2.6003	15.5833	15.8833	15.4833	42.0039	44.4563	50.2699	0.054	0.052	0.049	2.83651	2.74638	2.82344	3.14495	3.14495	3.15795	2.85634	2.77513	2.843	6.70068	6.76625	6.8604	0.517428	0.591121	0.478691	7.21911	7.35131	7.34538
9	Xinmu NO. 1	2.5035	2.6269	2.4605	0.2066	0.23	0.2143	2.7101	2.8569	2.6748	17.2833	17.5833	17.1833	60.9158	46.3368	31.0274	0.038	0.026	0.032	2.47926	2.45659	2.49992	3.37696	3.4947	3.44883	2.54769	2.54016	2.57595	6.20515	6.51101	6.09857	0.710738	0.791237	0.737227	6.92322	7.29824	6.83305
10	Longmu 806	2.287	2.3104	2.144	0.1195	0.1229	0.1272	2.4065	2.4333	2.2712	15.9167	16.2167	15.8167	61.9067	45.2663	40.8554	0.076	0.054	0.033	3.32947	3.37459	3.38403	3.59266	3.5882	3.59343	3.34253	3.38538	3.39576	7.69048	7.76917	7.20962	0.429176	0.441387	0.45683	8.12087	8.21131	7.66429
11	Longmu 801	1.8139	1.9373	1.7709	0.1015	0.1249	0.1192	1.9154	2.0622	1.8901	16.2833	16.5833	16.1833	18.9247	38.4945	53.0768	0.018	0.03	0.045	2.76057	2.89619	2.86038	3.31379	3.36137	3.30058	2.78989	2.92437	2.88814	5.14975	5.50009	5.02767	0.337513	0.415323	0.396369	5.49235	5.91329	5.4198
12	Gongnong NO. 1	1.6707	1.6941	1.6277	0.132	0.1454	0.1297	1.8027	1.8395	1.7574	12.55	12.75	12.45	41.1445	65.526	35.3524	0.026	0.027	0.026	2.82387	2.89161	2.88974	3.68425	3.68425	3.69725	2.88687	2.95427	2.94934	4.79225	4.85937	4.66891	0.486893	0.536321	0.47841	5.2822	5.39003	5.14946
13	Gongnong NO. 3	0.9401	1.0635	0.8971	0.1223	0.1257	0.13	1.0624	1.1892	1.0271	14.6833	14.8833	14.5833	29.2903	31.0967	29.6774	0.026	0.023	0.025	2.78676	2.832	2.84138	2.86355	2.76222	2.82589	2.7956	2.82462	2.83942	2.65113	2.99912	2.52986	0.344546	0.354124	0.366239	2.99584	3.3534	2.8963
14	Zhaodong	2.369	2.2924	2.326	0.2383	0.2417	0.246	2.6073	2.5341	2.572	14.9667	15.1667	14.8667	67.1612	57.1596	41.3699	0.104	0.086	0.059	3.06372	2.83831	2.98302	3.29846	3.29846	3.31146	3.08517	2.8822	3.01443	7.01622	6.78936	6.88887	0.787056	0.798286	0.812488	7.80609	7.58693	7.7004
15	LW6010	2.8441	2.7675	2.9011	0.4599	0.4833	0.4476	3.304	3.2508	3.3487	18.0333	18.3333	17.9333	27.6431	36.4237	47.7586	0.018	0.027	0.049	3.45403	3.40891	3.46347	3.68892	3.60739	3.66115	3.48673	3.43842	3.48989	9.78979	9.52612	9.98599	1.67978	1.76525	1.63485	11.4704	11.2857	11.6256
16	Reindeer	1.6342	1.7576	1.5912	0.1106	0.114	0.1183	1.7448	1.8716	1.7095	16.4167	16.7167	16.3167	34.4507	28.7479	36.3958	0.035	0.026	0.029	3.0517	3.14249	3.1291	3.52516	3.59608	3.52362	3.08172	3.17012	3.1564	5.07871	5.46221	4.94507	0.392441	0.404505	0.419762	5.47183	5.86948	5.36113
17	Crown	2.3029	2.6263	2.4599	0.25	0.2534	0.2577	2.5529	2.8797	2.7176	15.8667	16.0667	15.7667	73.1078	66.7621	70.4515	0.067	0.046	0.031	3.24912	3.2402	3.22666	3.2077	3.27207	3.20288	3.24507	3.243	3.22441	7.45831	8.50569	7.96678	0.806887	0.817861	0.831739	8.26499	9.323	8.79821
18	Goldqueen	1.9141	2.0375	1.9711	0.1299	0.1533	0.1576	2.044	2.1908	2.1287	16.4167	16.7167	16.3167	33.2194	49.4623	46.7096	0.032	0.06	0.04	2.97684	3.06793	3.05438	3.36364	3.31688	3.30326	3.00142	3.08535	3.07281	5.80556	6.17984	5.97845	0.432298	0.510171	0.524481	6.24073	6.68894	6.49933
19	Giant 551	1.9547	1.8781	1.9117	0.1053	0.1087	0.1093	2.06	1.9868	2.021	14.6667	14.8667	14.5667	29.1055	39.5069	29.8414	0.021	0.028	0.029	2.67715	2.74507	2.74311	3.09241	3.11752	3.10297	2.69838	2.76545	2.76257	5.32026	5.11177	5.20322	0.326883	0.337437	0.3393	5.64879	5.44807	5.54185
20	Giant 601	2.4872	2.3106	2.1442	0.1885	0.1819	0.1862	2.6757	2.4925	2.3304	17.1	17.4	17	43.706	26.7096	61.98	0.034	0.024	0.038	3.5772	3.53162	3.58641	3.6767	3.69477	3.69874	3.58421	3.54353	3.59539	8.86706	8.23747	7.64424	0.695578	0.671224	0.687091	9.56395	8.90913	8.32972
21	Giant 6	1.6943	1.5177	1.6513	0.2097	0.2131	0.1974	1.904	1.7308	1.8487	15.6333	15.8333	15.5333	33.213	38.837	35.479	0.037	0.018	0.026	2.95313	2.88482	2.95098	2.73475	2.73475	2.74775	2.92908	2.86635	2.92928	4.96369	4.44632	4.83772	0.574386	0.583698	0.540695	5.53728	5.03357	5.37645
22	Giant 2	2.2362	2.3596	2.1932	0.3118	0.3352	0.3995	2.548	2.6948	2.5927	14.2833	14.5833	14.1833	77.561	44.8784	54.7191	0.096	0.041	0.089	3.34656	3.36943	3.38999	3.59933	3.51234	3.56884	3.37749	3.38721	3.41755	7.53299	7.94869	7.38814	1.11006	1.19337	1.42229	8.64812	9.14637	8.79983
23	Sadie 7	0.6019	0.5353	0.5689	0.21	0.2034	0.2177	0.8119	0.7387	0.7866	12.2667	12.4667	12.1667	41.1182	29.945	53.8231	0.026	0.016	0.034	2.42518	2.44768	2.46843	3.46338	3.46761	3.47849	2.69371	2.72852	2.74798	1.47291	1.30993	1.39215	0.728664	0.705763	0.755381	2.21113	2.01178	2.14223
24	Sadie 10	1.9224	2.0458	1.8794	0.1612	0.1646	0.1689	2.0836	2.2104	2.0483	14.2333	14.4333	14.1333	31.3914	44.1576	22.1624	0.019	0.027	0.018	3.17592	3.13043	3.18518	3.01239	3.07707	3.05773	3.16327	3.12646	3.17467	6.08217	6.47259	5.94613	0.491509	0.501876	0.514987	6.57334	6.97337	6.46197
25	Tourists	0.6006	0.644	0.6776	0.1625	0.1759	0.1702	0.7631	0.8199	0.8478	15.9167	16.2167	15.8167	31.8518	26.2978	35.8359	0.039	0.033	0.034	2.17522	2.17522	2.20722	2.65905	2.66238	2.62371	2.27825	2.27974	2.29084	1.31285	1.40771	1.48116	0.430361	0.46585	0.450754	1.74211	1.87178	1.93548
26	Elite	1.5935	1.6169	1.5505	0.128	0.1214	0.1257	1.7215	1.7383	1.6762	13	13.2	12.9	48.2747	47.2831	41.5531	0.03	0.043	0.04	2.96032	3.30403	3.16418	3.20833	3.21667	3.2755	2.97876	3.29793	3.17252	5.00812	5.08166	4.87298	0.413888	0.392547	0.406451	5.42227	5.47519	5.27959
27	Weston	1.3248	1.4482	1.2818	0.3286	0.352	0.3163	1.6534	1.8002	1.5981	12.9667	13.2667	12.8667	55.068	36.7152	22.3496	0.044	0.047	0.028	2.38324	2.39174	2.36949	3.18907	3.16175	3.18841	2.54339	2.54231	2.53157	3.155	3.44887	3.05259	1.04486	1.11927	1.00575	4.19813	4.57087	4.05772
28	Algonquin	1.7529	1.8763	1.7099	0.1461	0.1595	0.1438	1.899	2.0358	1.8537	16.4333	16.6333	16.3333	46.0453	27.8566	51.6924	0.035	0.02	0.027	2.75358	3.09552	2.95655	3.19838	3.11684	3.12061	2.7878	3.09719	2.96928	5.14514	5.50735	5.01893	0.459525	0.501672	0.452291	5.60475	6.00851	5.47105
Note: SDW, RDW, PDW, SH, RL, RV, SNC, RNC, PNC, SNA, RNA and PNA respective shoot dry weight, root dry weight, plant dry weight, plant height, total root length, total root volume, shoot nitrogen content, root nitrogen content, plant nitrogen content, shoot nitrogen accumulation, root nitrogen accumulation and plant nitrogen accumulation.
Table S3 Changes of 28 alfalfa cultivars under medium nitrogen level (N210) in seedling stage
NO.	Cultivars	SDW	RDW	PDW	SH	RL	RV	SNC	RNC	PNC	SNA	RNA	PNA
		(g•plant -1)	(g•plant -1)	(g•plant -1)	(cm)	(cm•plant -1)	(cm3)	(%)	(%)	(%)	(mg•plant -1)	(mg•plant -1)	(mg•plant -1)
1	Gannong NO. 3	2.23±0.22e	0.24±0.01c	2.47±0.21defg	15.17±0.21g	40.02±13.88bcde	0.04±0.02cde	2.14±0.02o	2.78±0.05ij	2.21±0.02mm	4.78±0.48ghi	0.67±0.03fg	5.44±0.47ijk
2	Gannong NO. 4	2.19±0.09e	0.14±0.02ijk	2.33±0.09g	15.90±0.15ef	46.02±4.45bcde	0.02±0.01de	2.96±0.15gh	3.49±0.01c	2.99±0.14gh	6.49±0.26de	0.48±0.05jklm	6.97±0.27fg
3	Gannong NO. 5	2.25±0.07e	0.20±0.00def	2.44±0.07efg	17.68±0.15b	39.72±7.67bcde	0.02±0.01e	3.36±0.04bc	3.1±0.07gh	3.34±0.03cd	7.54±0.23c	0.61±0.01g	8.15±0.23c
4	Gannong NO. 7	1.34±0.03k	0.19±0.00efg	1.53±0.04n	14.82±0.15h	59.89±10.45ab	0.09±0.04a	3.25±0.04cd	3.24±0.02e	3.25±0.03de	4.36±0.11i	0.61±0.01g	4.96±0.12k
5	Gannong NO. 8	1.15±0.09l	0.2±0.01def	1.35±0.09p	14.80±0.15h	37.14±10.18de	0.03±0.02cde	2.28±0.08mn	3.45±0.02c	2.45±0.08l	2.62±0.21l	0.68±0.03fg	3.30±0.22m
6	Gannong NO. 9	1.43±0.03k	0.19±0.00efg	1.62±0.03mn	13.72±0.15g	45.97±9.29bcde	0.03±0.00cde	3.19±0.02de	3.3±0.01d	3.20±0.02e	4.57±0.11hi	0.62±0.01g	5.19±0.10jk
7	Longdong	1.72±0.04hij	0.15±0.02hi	1.88±0.03ijk	13.38±0.15k	50.11±1.37bcde	0.05±0.03bcd	2.12±0.02o	2.64±0.02k	2.17±0.02n	3.66±0.08j	0.41±0.05lmno	4.07±0.07l
8	Xinjiangdaye	2.42±0.03bcd	0.17±0.02gh	2.59±0.03cde	15.65±0.21f	45.58±4.25bcde	0.05±0.00bcd	2.80±0.05jk	3.15±0.01fg	2.82±0.04jk	6.78±0.08d	0.53±0.06ij	7.31±0.07ef
9	Xinmu NO. 1	2.53±0.09bcd	0.22±0.01def	2.75±0.1b	17.35±0.21c	46.09±14.95bcde	0.03±0.01cde	2.48±0.02l	3.44±0.06c	2.55±0.02l	6.27±0.21ef	0.75±0.04def	7.02±0.25fg
10	Longmu 806	2.25±0.09e	0.12±0.00jkl	2.37±0.09fg	15.98±0.21e	49.34±11.1bcde	0.05±0.02bc	3.36±0.03bc	3.59±0.00b	3.37±0.03bc	7.56±0.30c	0.44±0.01klmn	8.00±0.29cd
11	Longmu 801	1.84±0.09fgh	0.12±0.01kl	1.96±0.09ij	16.35±0.21d	36.83±17.14be	0.03±0.01cde	2.84±0.07hijk	3.33±0.03d	2.87±0.07ij	5.23±0.25g	0.38±0.04no	5.61±0.27ij
12	Gongnong NO. 1	1.66±0.03ij	0.14±0.01ijk	1.8±0.04jkl	12.58±0.15m	47.34±16.01bcde	0.03±0.00cde	2.87±0.04hij	3.69±0.01a	2.93±0.04hij	4.77±0.10ghi	0.50±0.03ijk	5.27±0.12ijk
13	Gongnong NO. 3	0.97±0.09m	0.13±0.00jkl	1.09±0.09p	14.72±0.15h	30.02±0.95e	0.02±0.00cde	2.82±0.03ijk	2.82±0.05i	2.82±0.02jk	2.73±0.24l	0.35±0.01o	3.08±0.24m
14	Zhaodong	2.33±0.04cde	0.24±0.00c	2.57±0.04cde	15.00±0.15gh	55.23±13.00abcd	0.08±0.02a	2.96±0.11gh	3.30±0.01d	2.99±0.10gh	6.90±0.11d	0.80±0.01de	7.70±0.11de
15	LW6010	2.84±0.07a	0.46±0.02a	3.30±0.05a	18.10±0.21a	37.28±10.08de	0.03±0.02cde	3.44±0.03b	3.65±0.04a	3.47±0.03ab	9.77±0.23a	1.69±0.07a	11.46±0.17a
16	Reindeer	1.66±0.09ij	0.11±0.00kl	1.78±0.09kl	16.48±0.21d	33.20±3.97e	0.03±0.00cde	3.11±0.05ef	3.55±0.04b	3.14±0.05ef	5.16±0.27g	0.41±0.01mno	5.57±0.27ij
17	Crown	2.46±0.16bc	0.25±0.00c	2.72±0.16bc	15.90±0.15ef	70.11±3.19a	0.05±0.02cde	3.24±0.01d	3.23±0.04e	3.24±0.01de	7.98±0.52bc	0.82±0.01d	8.80±0.53b
18	Goldqueen	1.97±0.06f	0.15±0.01hij	2.12±0.07h	16.48±0.21d	43.13±8.69bcde	0.04±0.01cde	3.03±0.05fg	3.33±0.03d	3.05±0.05fg	5.99±0.19f	0.49±0.05ijkl	6.48±0.22h
19	Giant 551	1.91±0.04fg	0.11±0.00l	2.02±0.04hi	14.70±0.15h	32.82±5.80e	0.03±0.00cde	2.72±0.04k	3.10±0.01gh	2.74±0.04k	5.21±0.10g	0.33±0.01o	5.55±0.10ij
20	Giant 601	2.31±0.17cde	0.19±0.00fg	2.50±0.17def	17.17±0.21c	44.13±17.64bcde	0.03±0.01cde	3.57±0.03a	3.69±0.01a	3.57±0.03a	8.25±0.61b	0.68±0.01fg	8.93±0.62b
21	Giant 6	1.62±0.09ij	0.21±0.01def	1.83±0.09jkl	15.67±0.15ef	35.84±2.83de	0.03±0.01ab	2.93±0.04ghi	2.74±0.01j	2.91±0.04hij	4.75±0.27ghi	0.57±0.02hi	5.32±0.26ijk
22	Giant 2	2.26±0.09de	0.35±0.05b	2.61±0.08bcd	14.35±0.21i	59.05±16.77abc	0.08±0.03cde	3.37±0.02b	3.56±0.04b	3.39±0.02bc	7.62±0.29c	1.24±0.16b	8.86±0.26b
23	Sadie 7	0.57±0.03n	0.21±0.01de	0.78±0.04q	12.3±0.15m	41.63±11.95bcde	0.03±0.01e	2.45±0.02l	3.47±0.01c	2.72±0.03k	1.39±0.08m	0.73±0.02ef	2.12±0.10n
24	Sadie 10	1.95±0.09f	0.16±0.00gh	2.11±0.09h	14.27±0.15i	32.57±11.04e	0.02±0.00cde	3.16±0.03de	3.05±0.03h	3.15±0.03ef	6.17±0.27ef	0.50±0.01ijk	6.67±0.27gh
25	Tourists	0.64±0.04n	0.17±0.01gh	0.81±0.04q	15.98±0.21e	31.33±4.79e	0.04±0.00e	2.19±0.02no	2.65±0.02k	2.28±0.01mm	1.40±0.08m	0.45±0.02jklmn	1.85±0.10n
26	Elite	1.59±0.03j	0.13±0.00jkl	1.71±0.03lm	13.03±0.15l	45.70±3.63bcde	0.04±0.01cde	3.14±0.17def	3.23±0.04e	3.15±0.16ef	4.99±0.11gh	0.40±0.01mno	5.39±0.10ijk
27	Weston	1.35±0.09k	0.33±0.02b	1.68±0.1lm	13.03±0.21l	38.04±16.4cde	0.04±0.01cde	2.38±0.01lm	3.18±0.02ef	2.54±0.01l	3.22±0.21k	1.06±0.06c	4.28±0.27l
28	Algonquin	1.78±0.09ghi	0.15±0.01hi	1.93±0.09ijk	16.47±0.15d	41.86±12.46bcde	0.03±0.01cde	2.94±0.17ghi	3.15±0.05fg	2.95±0.16ghi	5.22±0.25g	0.47±0.03jklm	5.69±0.28i

## Sheet: Table S4
Table S3 Stem-leaf dry weight (SDW), root dry weight (RDW), whole plant dry weight (PDW), plant height (SH), total root length (RL), total root volume (RV), stem-leaf nitrogen content (SNC), root nitrogen content (RNC), whole plant nitrogen content (PNC), stem-leaf nitrogen accumulation (SNA), root nitrogen accumulation (RNA) and whole plant nitrogen accumulation (PNA) ranges, averages and coeffi…
Index	N21			N210
	Range	Average	CV (%)	Range	Average	CV (%)
SDW (g)	0.026～0.058	0.042	22.3	0.061～0.125	0.097	20.8
RDW (g)	0.013～0.035	0.024	24.3	0.006～0.012	0.009	21.2
PDW (g)	0.039～0.084	0.066	20	0.071～0.136	0.106	20
SH (cm)	4.93～9.67	7.38	15.2	12.27～18.03	15.2	10.1
RL (cm·plant -1)	48.31～98.97	68.49	20	30.11～55.72	42.39	20.1
RV (cm3)	27.67～87.33	56.9	23.6	23.00～55.33	36.82	28.4
SNC (%)	1.12～1.64	1.35	11.5	2.11～3.58	2.88	14.8
RNC (%)	0.92～1.74	1.26	14	2.64～3.69	3.25	9.4
PNC (%)	1.07～1.55	1.32	10.8	2.15～3.58	2.91	13.7
SNA (mg·plant -1)	0.34～0.90	0.57	29.1	1.34～4.45	2.82	29.4
RNA (mg·plant -1)	0.17～0.52	0.3	27.4	0.20～0.46	0.29	24.6
PNA (mg·plant -1)	0.51～1.27	0.87	25.1	1.68～4.80	3.1	27.9
NUE(kg·kg -1)	64.4～93.2	76.83	10.8	27.9～46.4	35.03	14.9

## Sheet: Table 1
Table 1 Coefficient of variation of different alfalfa parameters under low nitrogen level (N21) at the seedling stage
	SDW	RDW	PDW	SH	RL	RV	SNC	RNC	PNC	SNA	RNA	PNA
SDW	1
RDW	0.416*	1
PDW	0.907**	0.758**	1
SH	0.385*	-0.186	0.19	1
RL	0.642**	0.358	0.626**	0.422*	1
RV	0.950**	0.447*	0.890**	0.371	0.695**	1
SNC	0.352	-0.001	0.259	0.604**	0.443*	0.371	1
RNC	0.275	-0.1	0.141	0.454*	0.328	0.251	0.392*	1
PNC	0.416*	-0.091	0.257	0.652**	0.477*	0.409*	0.888**	0.761**	1
SNA	0.917**	0.307	0.802**	0.563**	0.684**	0.885**	0.688**	0.362	0.685**	1
RNA	0.549**	0.833**	0.775**	0.094	0.522**	0.568**	0.194	0.447*	0.321	0.486**	1
PNA	0.902**	0.552**	0.903**	0.460*	0.716**	0.885**	0.594**	0.449*	0.642**	0.941**	0.752**	1
Note: SDW, RDW, PDW, SH, RL, RV, SNC, RNC, PNC, SNA, RNA and PNA represent stem-leaf dry weight, root dry weight, whole plant dry weigh, plant height, total root length, total root volume, stem-leaf nitrogen content, root nitrogen content, whole plant nitrogen content, stem-leaf nitrogen accumulation, root nitrogen accumulation and whole plant nitrogen accumulation.* and ** represent significance…

## Sheet: Table 2
Table 2 Coefficient of variation of different alfalfa parameters under medium nitrogen level (N210) at the seedling stage
	SDW	RDW	PDW	SH	RL	RV	SNC	RNC	PNC	SNA	RNA	PNA
SDW	1
RDW	0.356	1
PDW	0.996**	0.435*	1
SH	0.538**	0.16	0.539**	1
RL	0.708**	0.454*	0.728**	0.549**	1
RV	0.799**	0.394*	0.812**	0.610**	0.825**	1
SNC	0.342	0.175	0.344	0.37	0.540**	0.426*	1
RNC	0.235	0.089	0.233	0.129	0.26	0.307	0.499**	1
PNC	0.336	0.193	0.34	0.363	0.536**	0.433*	0.997**	0.559**	1
SNA	0.869**	0.349	0.868**	0.573**	0.766**	0.791**	0.750**	0.444*	0.748**	1
RNA	0.451*	0.903**	0.520**	0.272	0.560**	0.539**	0.375*	0.470*	0.412*	0.529**	1
PNA	0.867**	0.408*	0.872**	0.570**	0.775**	0.798**	0.746**	0.463*	0.747**	0.998**	0.586**	1
Note: SDW, RDW, PDW, SH, RL, RV, SNC, RNC, PNC, SNA, RNA and PNA represent stem-leaf dry weight, root dry weight, whole plant dry weigh, plant height, total root length, total root volume, stem-leaf nitrogen content, root nitrogen content, whole plant nitrogen content, stem-leaf nitrogen accumulation, root nitrogen accumulation and whole plant nitrogen accumulation.* and ** represent significance…

## Sheet: Table 3
Table 3 Weight values and coefficient of variation (CV) of evaluation SDW, PDW, RL, RV, SNA and PNA for 28 alfalfa cultivars under different nitrogen levels at the seedling stage
Parameters	N21		N210
	CV (%)	Weight value	CV (%)	Weight value
SDW (g)	22.3	0.159	20.8	0.142
PDW (g)	20	0.143	20	0.136
RL (cm·plant -1)	20	0.143	20.1	0.137
RV (cm3)	23.6	0.169	28.4	0.193
SNA (mg·plant -1)	29.1	0.208	29.4	0.201
PNA (mg·plant -1)	25.1	0.179	27.9	0.191
Note: SDW, PDW, RL, RV, SNA and PNA represent stem-leaf dry weight, whole plant dry weigh, total root length, total root volume, stem-leaf nitrogen accumulation and whole plant nitrogen accumulation. N21 were the low nitrogen level. N210 were the medium nitrogen level.

[truncated: 2 more sheets: Table 4, Sheet2]
